# Supplementary material for: A Glimpse at Siderophores Production by Anabaena flos-aquae UTEX 1444
Source: MDPI journal article supplement (doi:10.3390/md20040256), 2022-04-06
Supplement: s1 [file s1]

# Supplementary material

## A Glimpse at siderophores production by *Anabaena Flos-aquae* UTEX 1444

Roberta Teta<sup>1</sup>, Germana Esposito<sup>1</sup>, Karishma Kundu<sup>1</sup>, Mariano Stornaiuolo<sup>2</sup>, Silvia Scarpato<sup>1</sup>, Antonino Pollio<sup>3</sup>, and Valeria Costantino<sup>1\*</sup>

<sup>1</sup> "TheBlueChemistryLab", Department of Pharmacy, Task force "BIGFED2", University of Naples Federico II, via Domenico Montesano 49, 80131 Napoli, Italy; [roberta.teta@unina.it](mailto:roberta.teta@unina.it) (R.T.), [germana.esposito@unina.it](mailto:germana.esposito@unina.it) (G.E.), [karishma.kundu@unina.it](mailto:karishma.kundu@unina.it) (K.K.), [mariano.stornaiuolo@unina.it](mailto:mariano.stornaiuolo@unina.it) (M.S.), [silvia.scarpato@unina.it](mailto:silvia.scarpato@unina.it) (S.S.), [valeria.costantino@unina.it](mailto:valeria.costantino@unina.it) (V.C.)

<sup>2</sup> Department of Pharmacy, University of Naples Federico II, via Domenico Montesano 49, 80131 Napoli, Italy; [mariano.stornaiuolo@unina.it](mailto:mariano.stornaiuolo@unina.it) (M.S.)

<sup>3</sup> Department of Biology, University of Naples Federico II, Complesso Universitario Monte Sant'Angelo via Cinthia – Edificio 7, 80126 Napoli, Italy; [antonino.pollio@unina.it](mailto:antonino.pollio@unina.it) (A.P.)

\* Correspondence: [valeria.costantino@unina.it](mailto:valeria.costantino@unina.it) (V.C.)

### Table of contents

|                                                                                          |      |
|------------------------------------------------------------------------------------------|------|
| Figure S1. Global molecular network of <i>A. flos-aquae</i> UTEX 1444's extracts .....   | p. 4 |
| Figure S2. MS/MS spectrum of schizokinen (1).....                                        | p. 5 |
| Figure S3. MS/MS spectrum of synechobactin A (2).....                                    | p. 4 |
| Figure S4. MS/MS spectrum of synechobactin B (3) .....                                   | p. 4 |
| Figure S5. MS/MS spectrum of synechobactin C <sub>14</sub> (4).....                      | p. 4 |
| Figure S6. MS/MS spectrum of synechobactin C <sub>16</sub> (5).....                      | p. 4 |
| Figure S7. MS/MS spectrum of putative synechobactin C <sub>16:1</sub> (6).....           | p. 4 |
| Figure S8. MS/MS spectrum of putative synechobactin oxyC <sub>14</sub> (7).....          | p. 4 |
| Figure S9. MS/MS spectrum of putative synechobactin oxyC <sub>14:1</sub> (8) .....       | p. 4 |
| Figure S10. MS/MS spectrum of putative desacetyl-synechobactin A (9) .....               | p. 4 |
| Figure S11. MS/MS spectrum of putative desacetyl-synechobactin C <sub>14</sub> (10)..... | p. 4 |
| Figure S12. MS/MS spectrum of putative deoxysynechobactin C <sub>14</sub> (11) .....     | p. 4 |
| Figure S13. MS/MS spectrum of putative deoxysynechobactin C <sub>14:1</sub> (12) .....   | p. 4 |



F: FTMS + c ESI d Full ms2 421.19@cid35.00 [105.00-435.00]

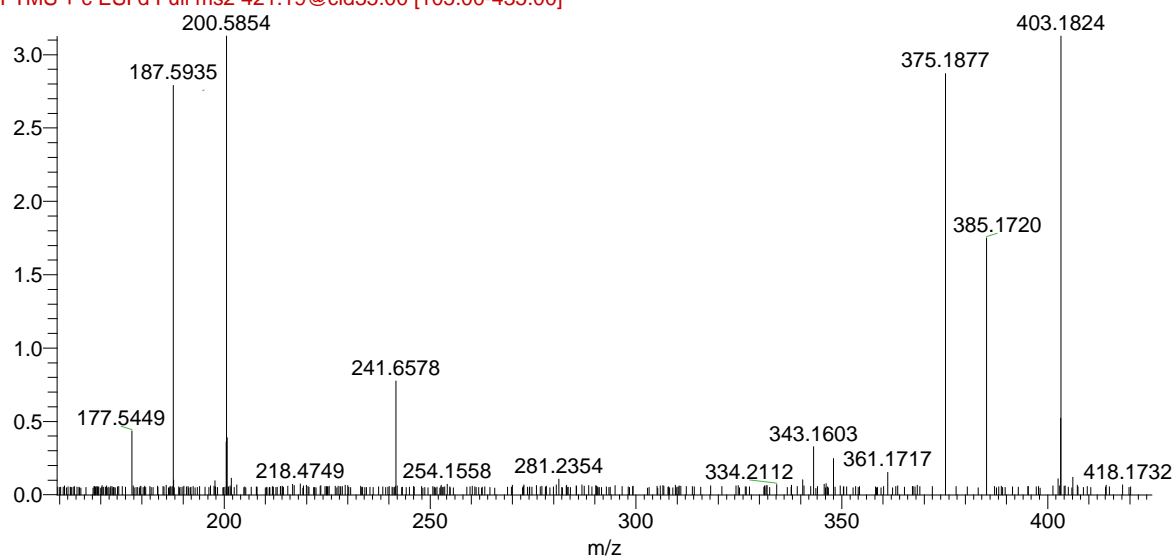

Figure S2. MS/MS spectrum of schizokinen (1)

F: FTMS + c ESI d Full ms2 561.35@cid35.00 [140.00-575.00]

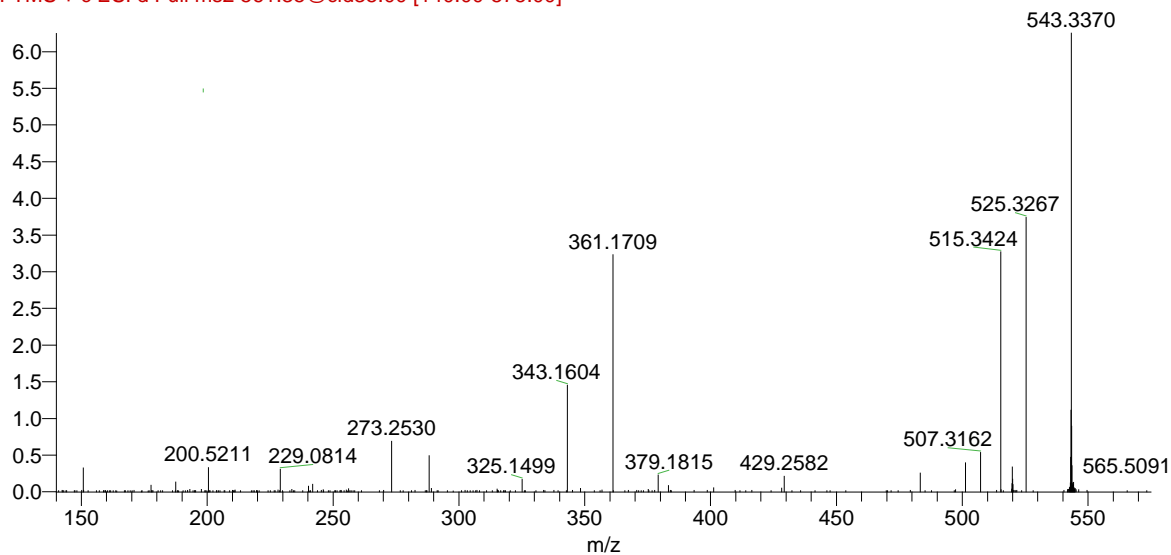

Figure S3. MS/MS spectrum of synechobactin A (2)

F: FTMS + c ESI d Full ms2 533.32@cid35.00 [135.00-545.00]

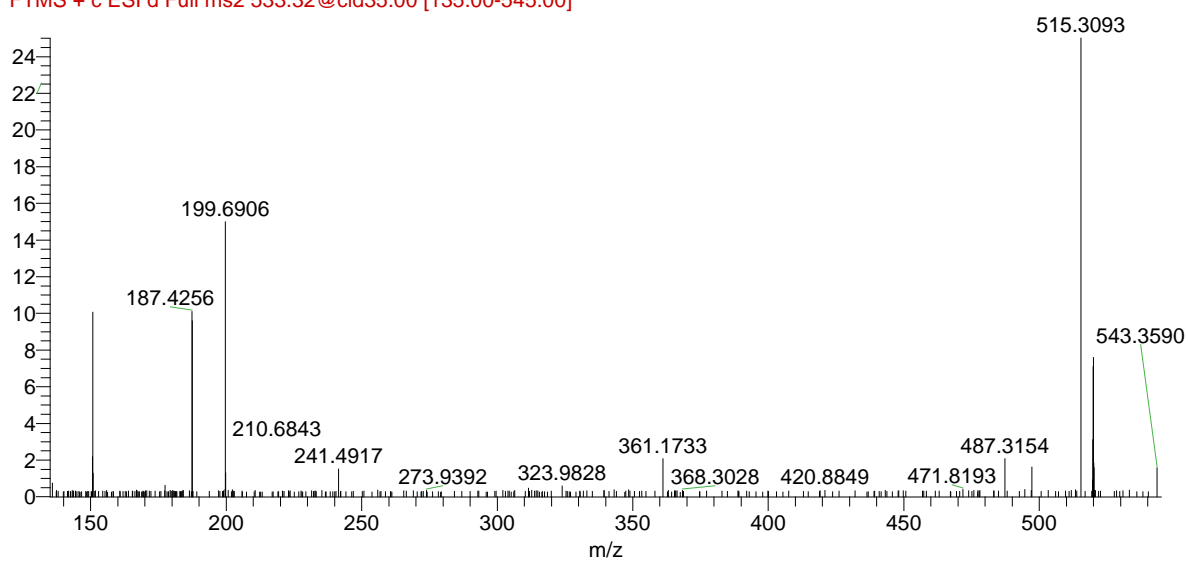

Figure S4. MS/MS spectrum of synechobactin B (3)

F: FTMS + c ESI d Full ms2 589.38@cid35.00 [150.00-600.00]

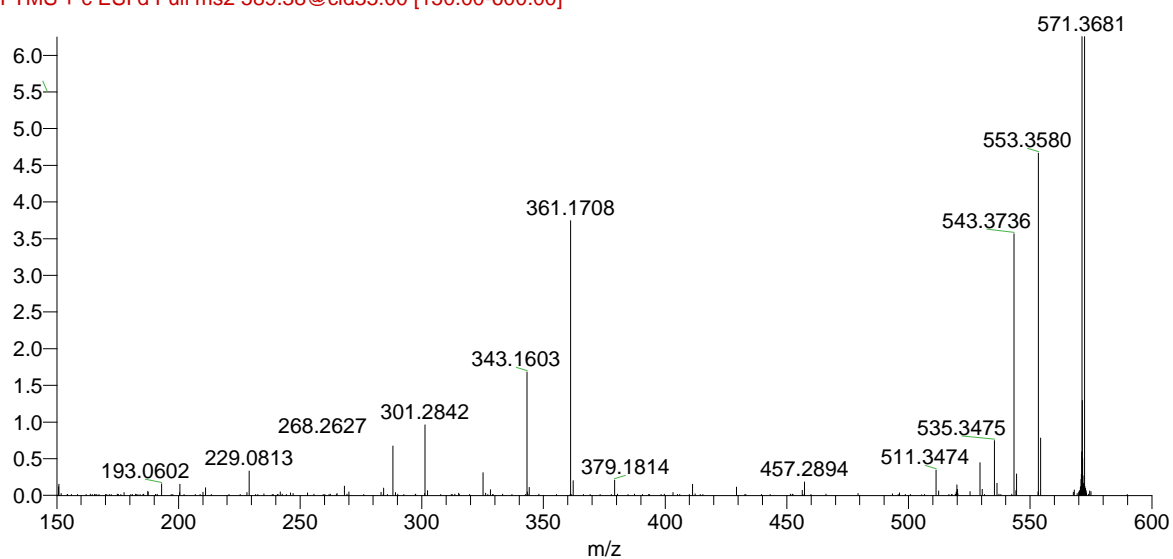

Figure S5. MS/MS spectrum of synechobactin C<sub>14</sub> (4)

F: FTMS + c ESI d Full ms2 617.41@cid35.00 [155.00-630.00]

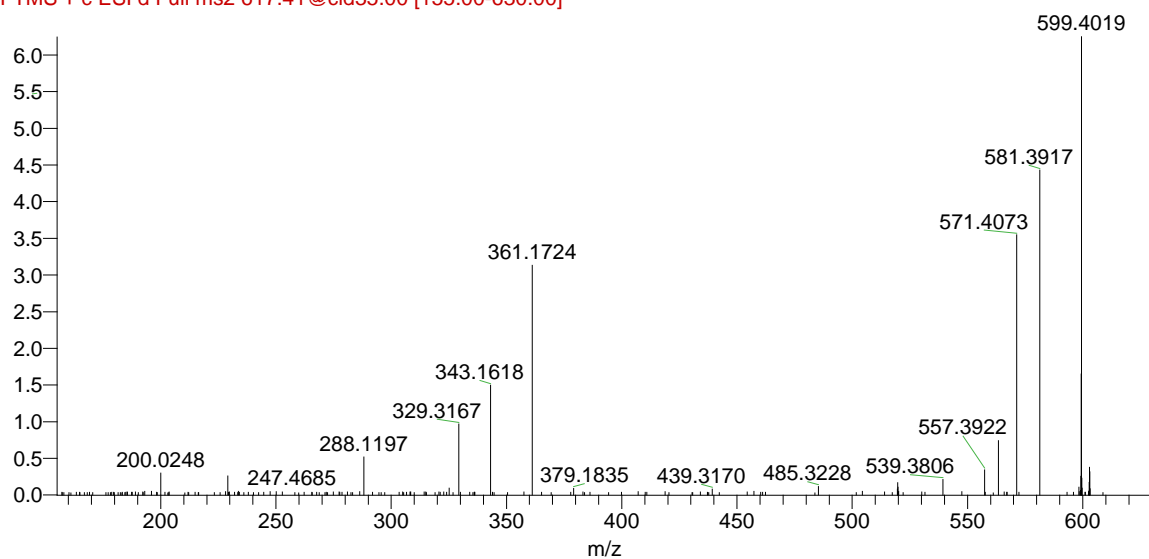

Figure S6. MS/MS spectrum of synechobactin C<sub>16</sub> (5)

F: FTMS + c ESI d Full ms2 615.39@cid35.00 [155.00-630.00]

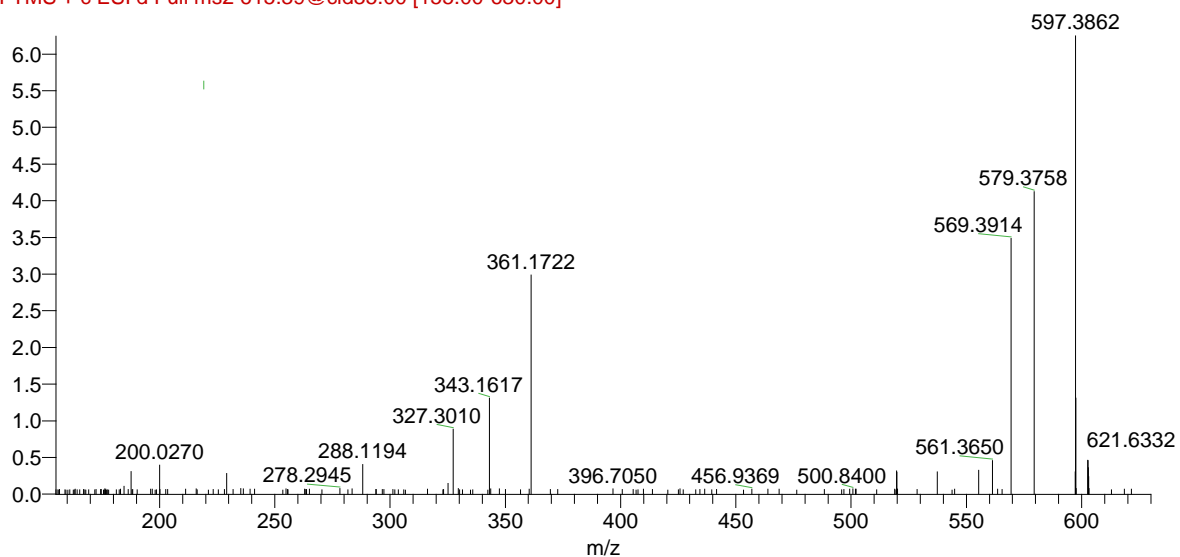

Figure S7. MS/MS spectrum of putative synechobactin C<sub>16:1</sub> (6)

F: FTMS + c ESI d Full ms2 605.37@cid35.00 [155.00-620.00]

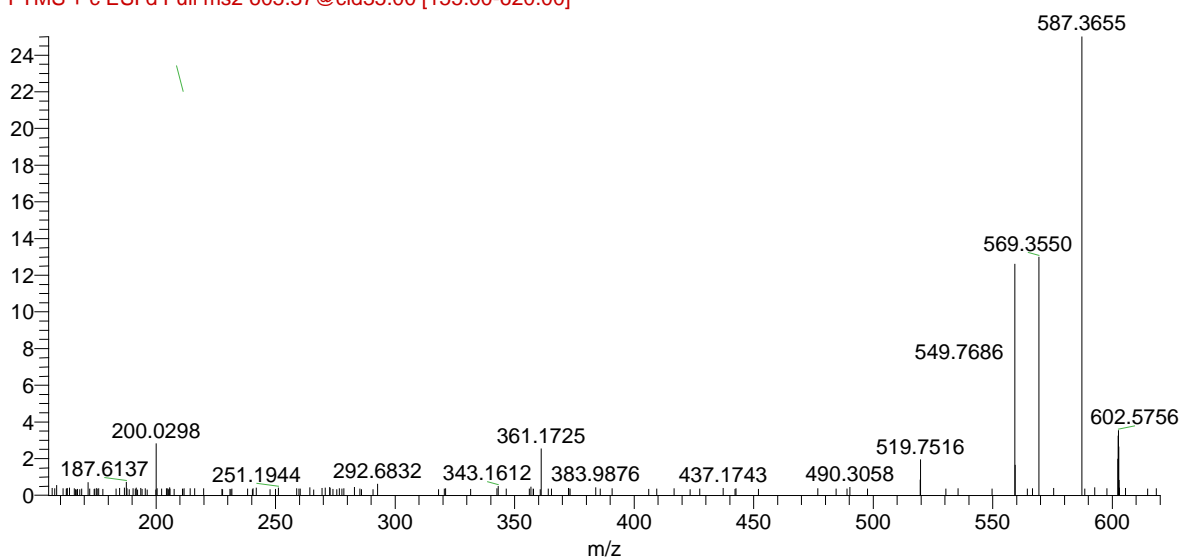

Figure S8. MS/MS spectrum of putative synechobactin oxyC<sub>14</sub> (7)

F: FTMS + c ESI d Full ms2 603.31@cid35.00 [155.00-615.00]

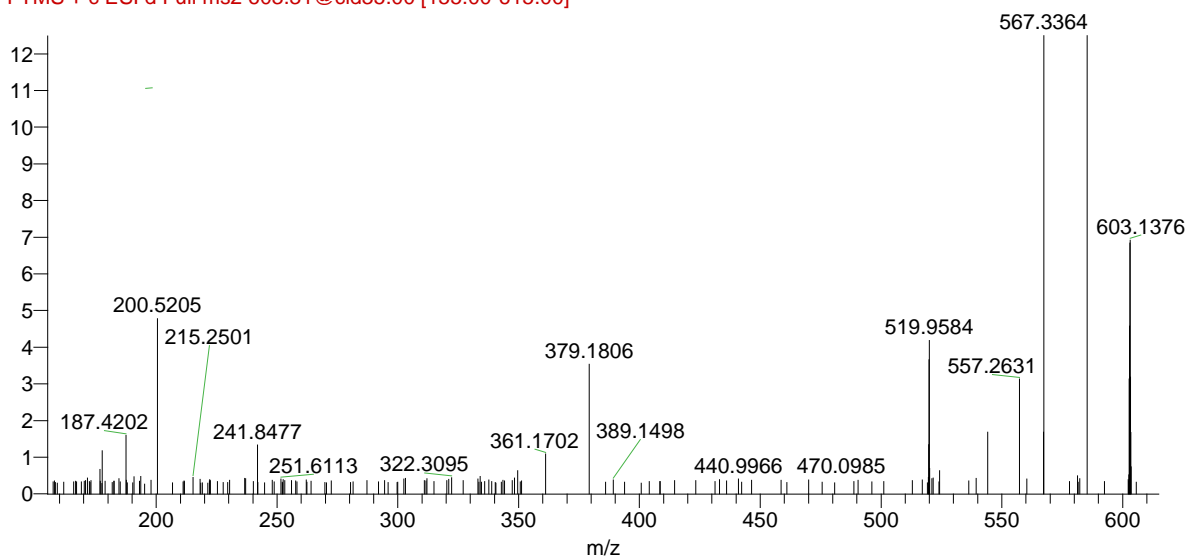

Figure S9. MS/MS spectrum of putative synechobactin oxyC<sub>14:1</sub> (8)

F: FTMS + c ESI d Full ms2 517.32@cid35.00 [130.00-530.00]

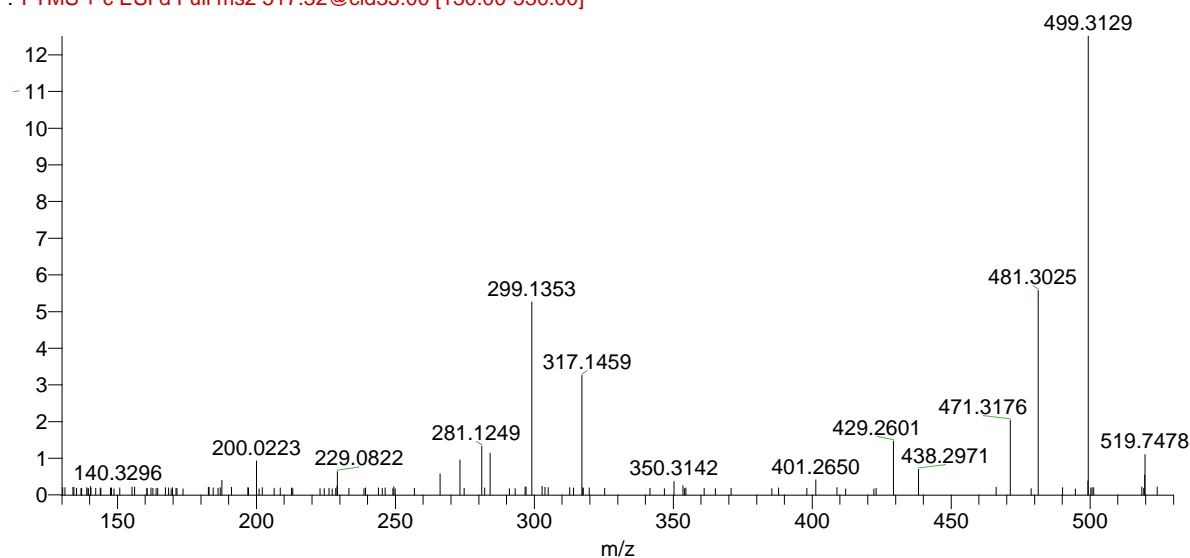

Figure S10. MS/MS spectrum of putative desacetyl-synechobactin A (9)

F: FTMS + c ESI d Full ms2 545.35@cid35.00 [140.00-560.00]

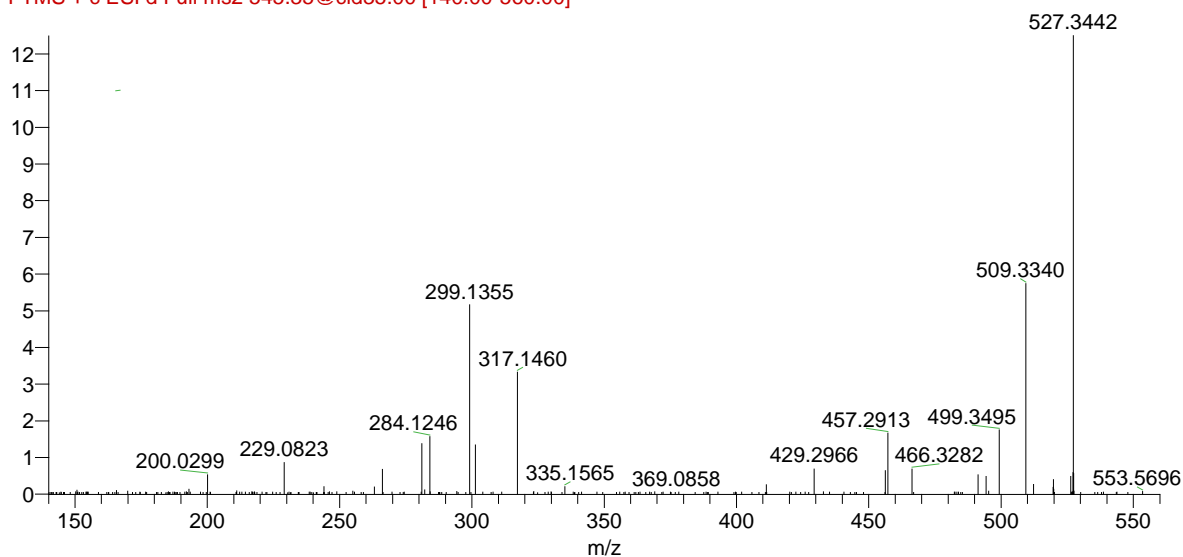

Figure S11. MS/MS spectrum of putative desacetyl-synechobactin C<sub>14</sub> (10)

F: FTMS + c ESI d Full ms2 573.38@cid35.00 [145.00-585.00]

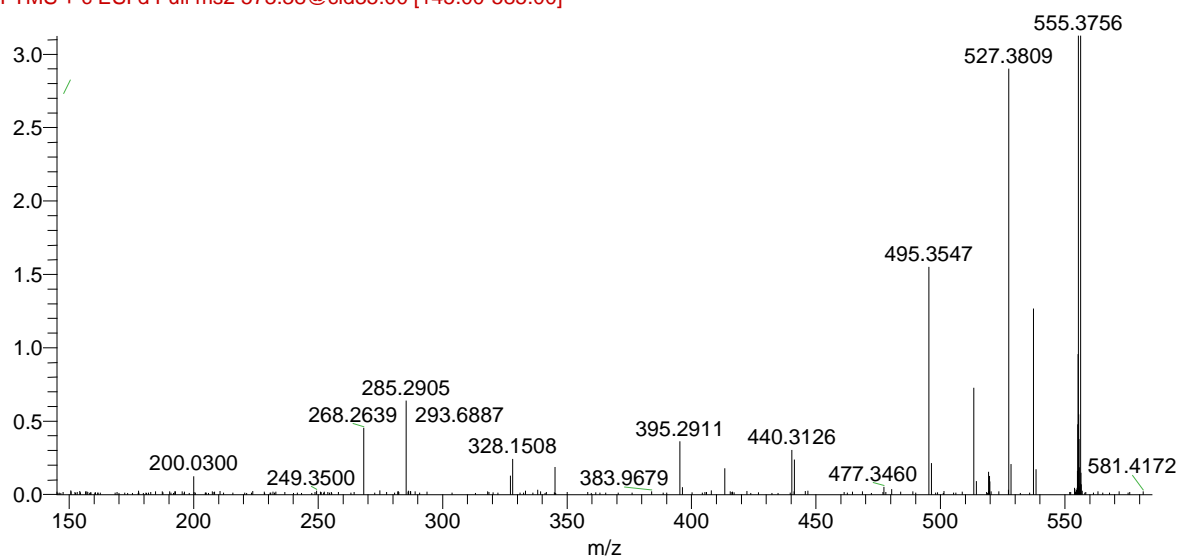

Figure S12. MS/MS spectrum of putative deoxysynechobactin C<sub>14</sub> (11)

F: FTMS + c ESI d Full ms2 571.37@cid35.00 [145.00-585.00]

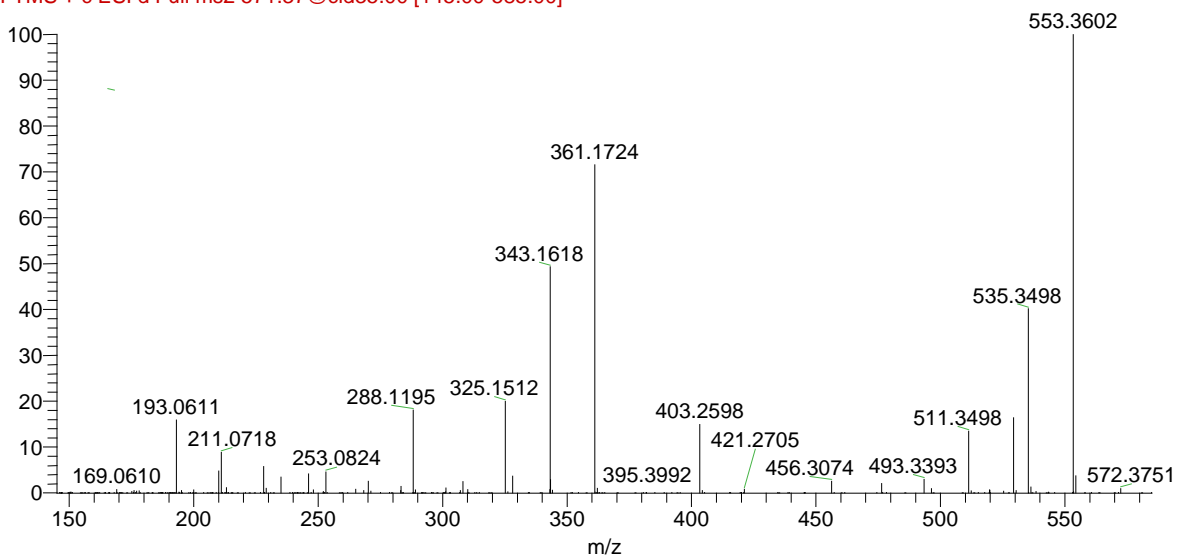

Figure S13. MS/MS spectrum of putative deoxysynechobactin C<sub>14:1</sub> (12)
